# Supplementary material for: Rapid Determination of Active Compounds and Antioxidant Activity of Okra Seeds Using Fourier Transform Near Infrared (FT-NIR) Spectroscopy
Source: PubMed Central journal article supplement (PMC6017380; doi:10.3390/molecules23030550), 2018-03-02
Supplement: molecules-23-00550-s001.pdf [file molecules-23-00550-s001.pdf]

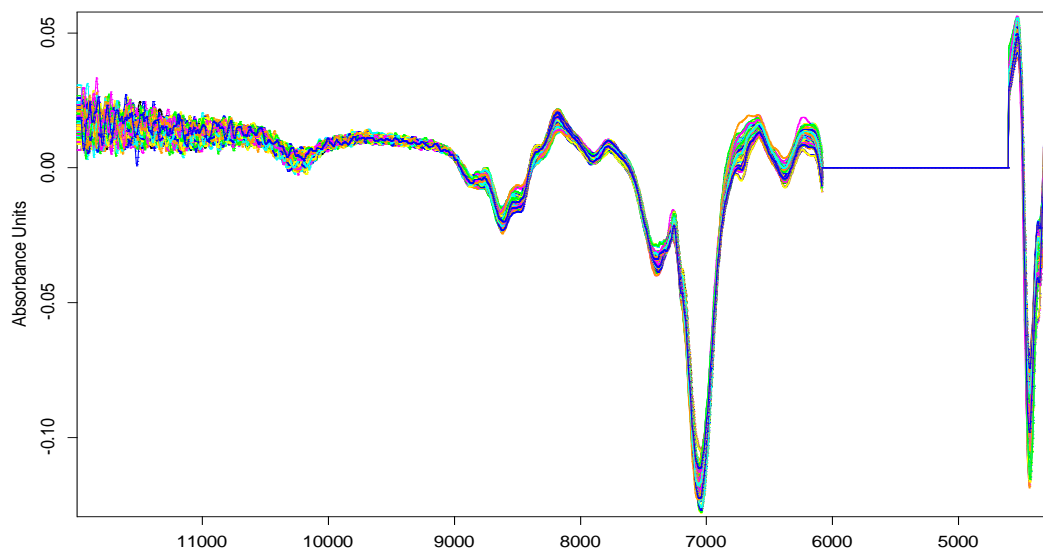

Figure S1. The NIR spectrum of okra seeds preprocessed with FD+SNV for isoquercitrin (11995.5~6098, 4601.5~4246.1  $\text{cm}^{-1}$ )

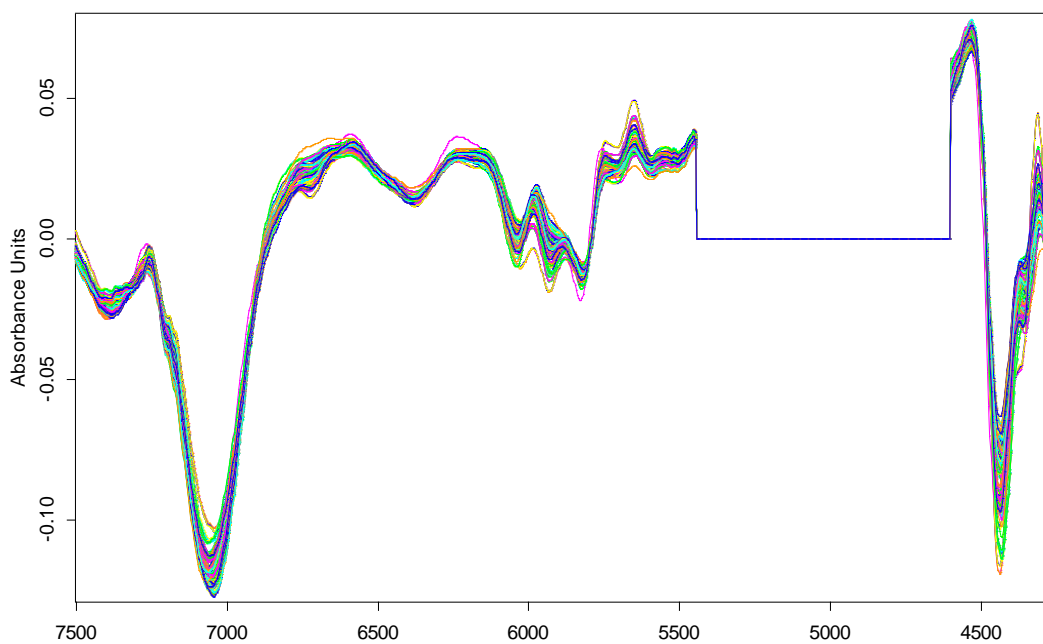

Figure S2. The NIR spectrum of okra seeds preprocessed with FD+SNV for quercetin-3-O-gentiobiose (7502~5446.2; 4601.5~4246.6  $\text{cm}^{-1}$ )

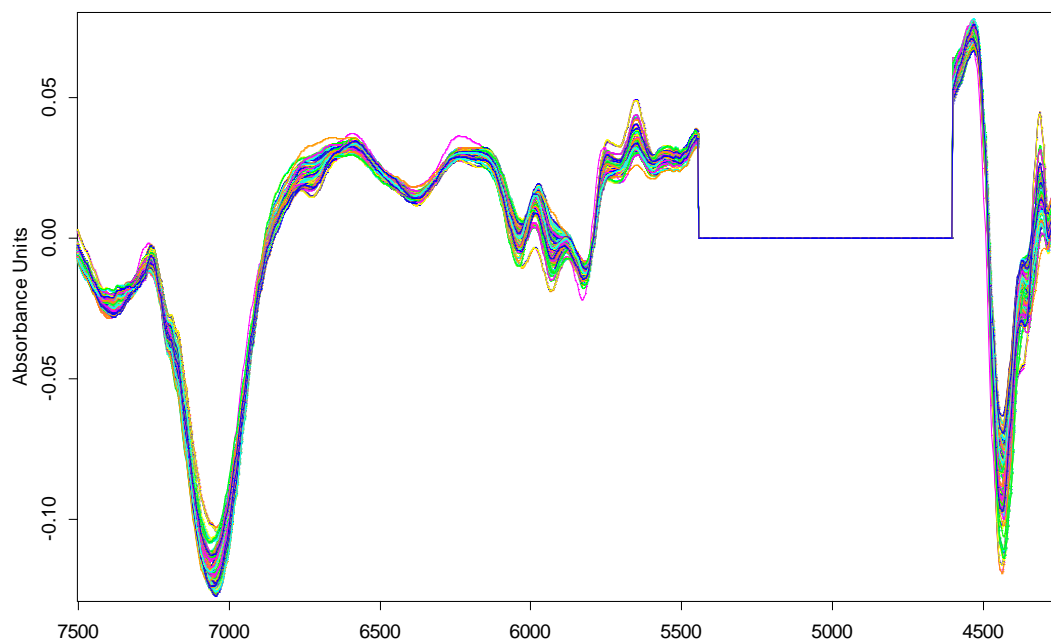

Figure S3. The NIR spectrum of okra seeds preprocessed with FD+SNV for total polyphenol (7502~5446.2; 4601.5~4246.6  $\text{cm}^{-1}$ )

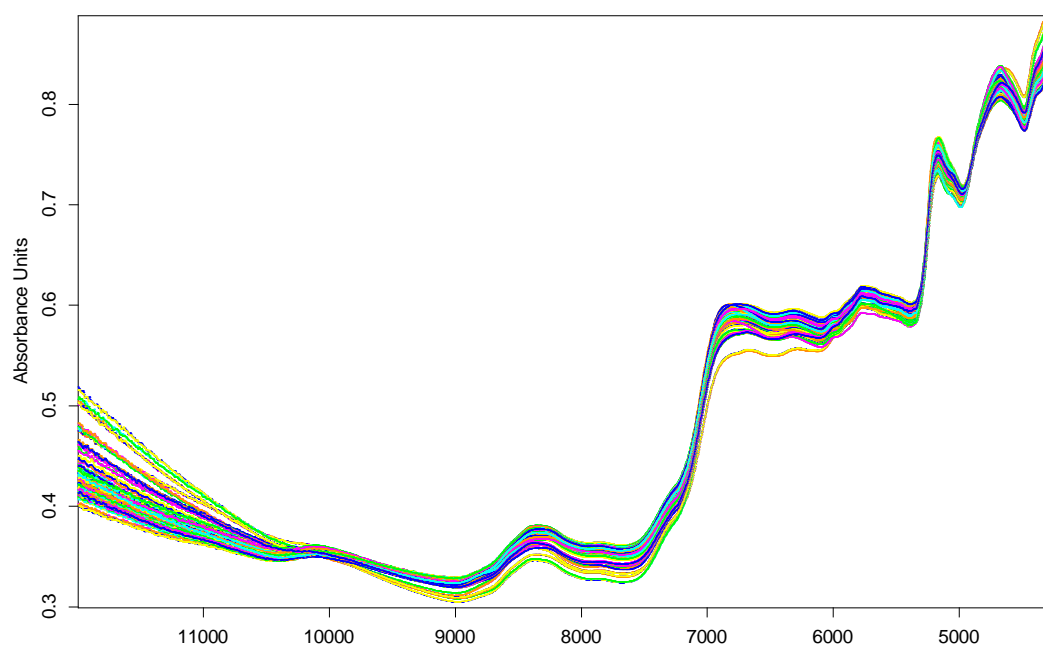

Figure S4. The NIR spectrum of okra seeds preprocessed with MSC for DPPH (11995.5~4246.6  $\text{cm}^{-1}$ )

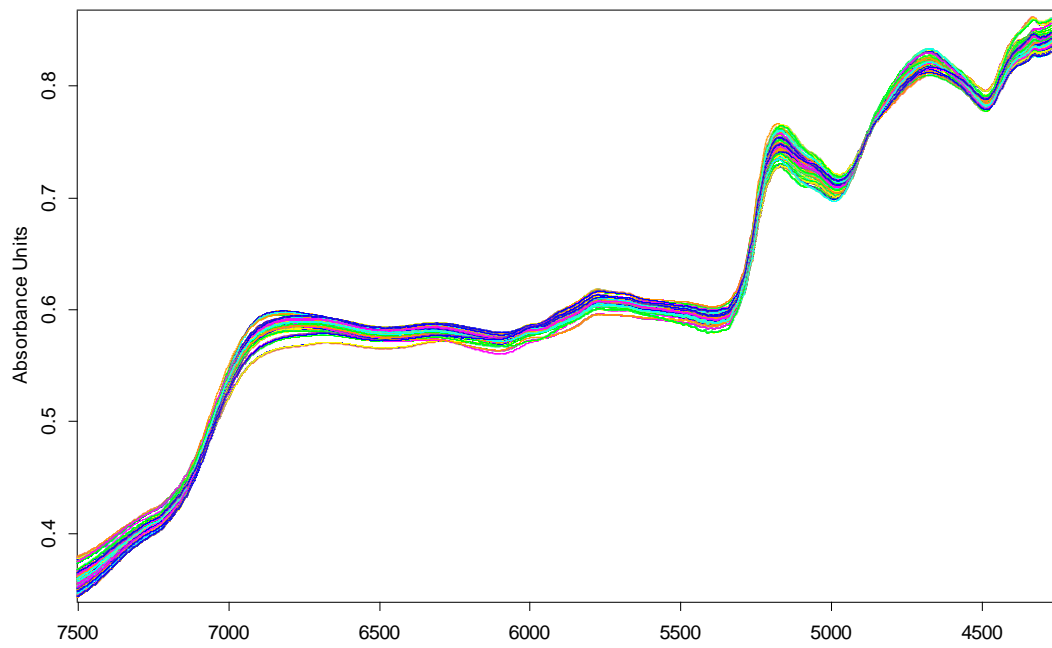

Figure S5. The NIR spectrum of okra seeds preprocessed with MSC for FRAP (7502~4246.5  $\text{cm}^{-1}$ )
